# Supplementary material for: AC2P20 selectively kills Mycobacterium tuberculosis at acidic pH by depleting free thiols
Source: Royal Society of Chemistry journal article supplement (doi:10.1039/d1ra03181c), 2021-01-01
Supplement: d1ra03181c1.pdf [file d1ra03181c1.pdf]

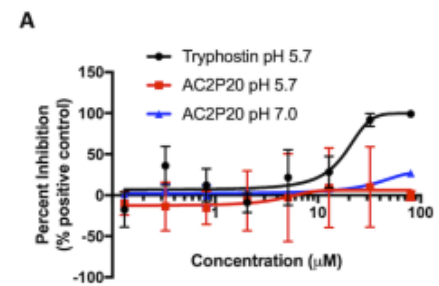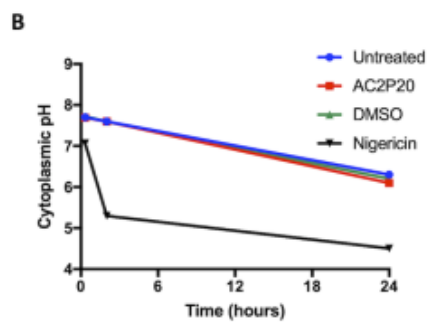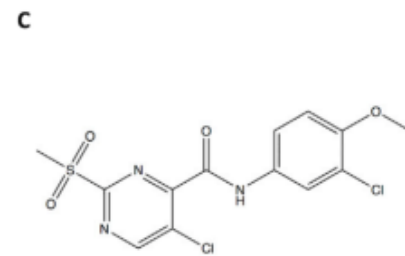

**A**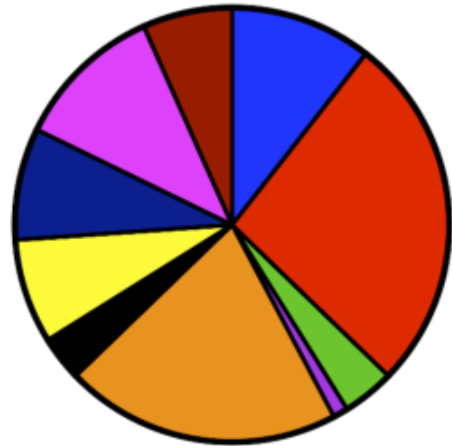

- Cell Wall and Cell Processes
- Conserved Hypotheticals
- Information Pathways
- Insertion Sequences and Phages
- Intermediary Metabolism and Respiration
- Lipid Metabolism
- PE/PPE Families
- Regulatory Proteins
- Virulence, Detoxification and Adaption
- Unknown

**Total=180****B**

AC2P36 AC2P20

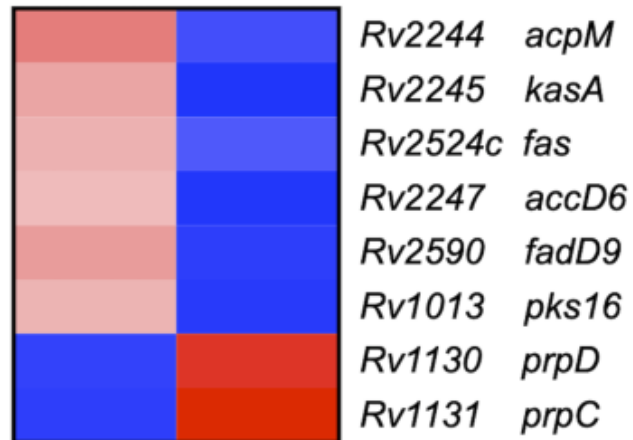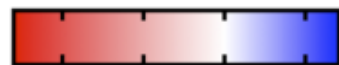

-5.0 -2.5 0 2.5

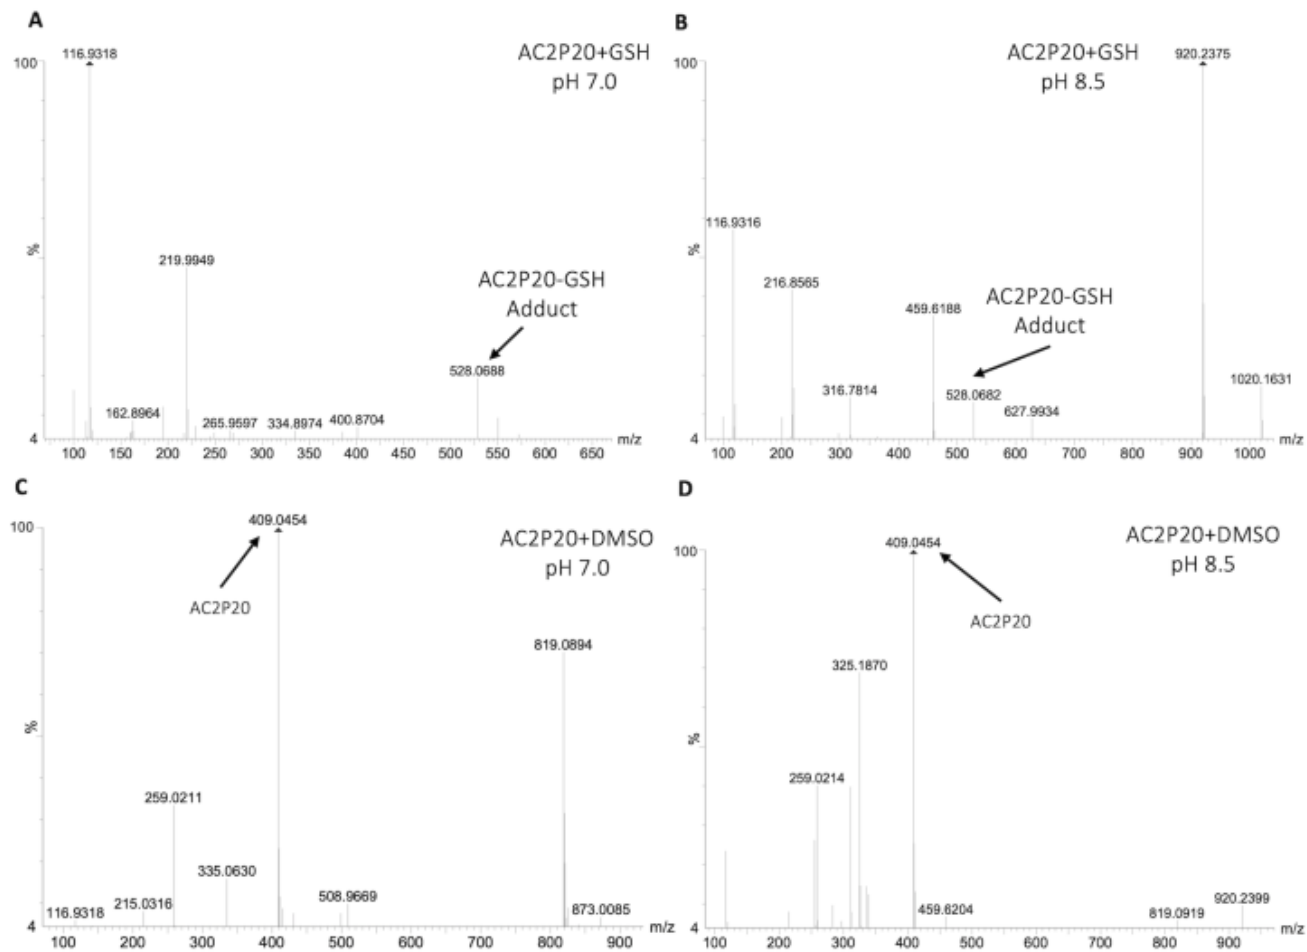

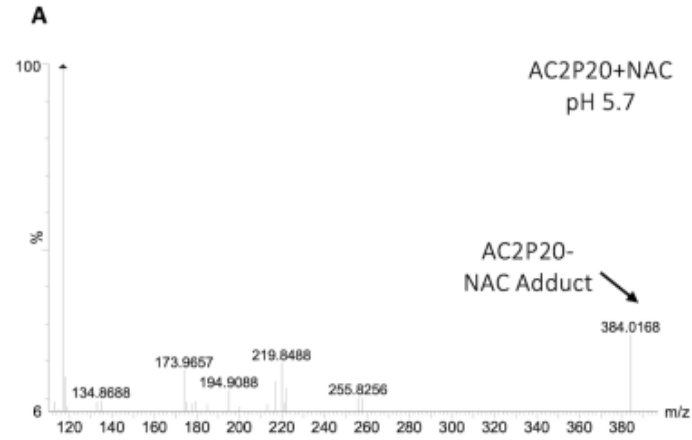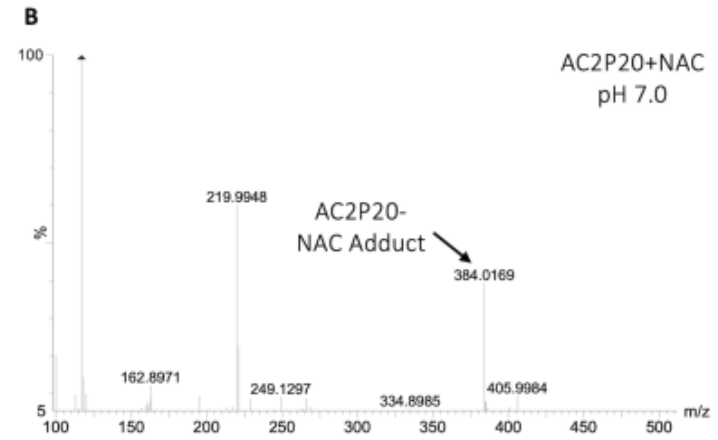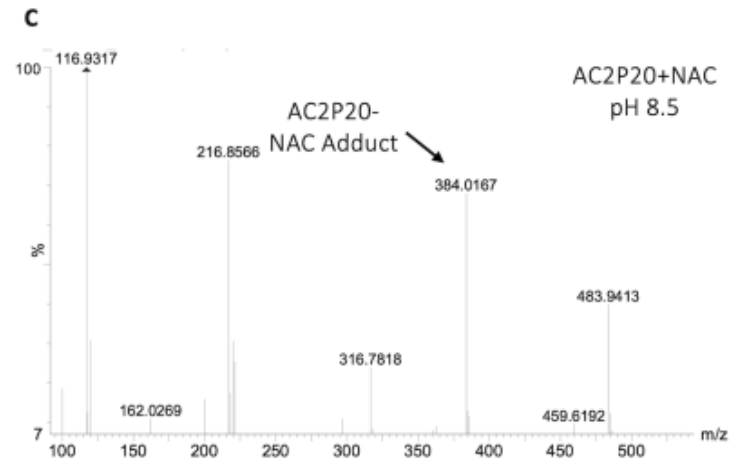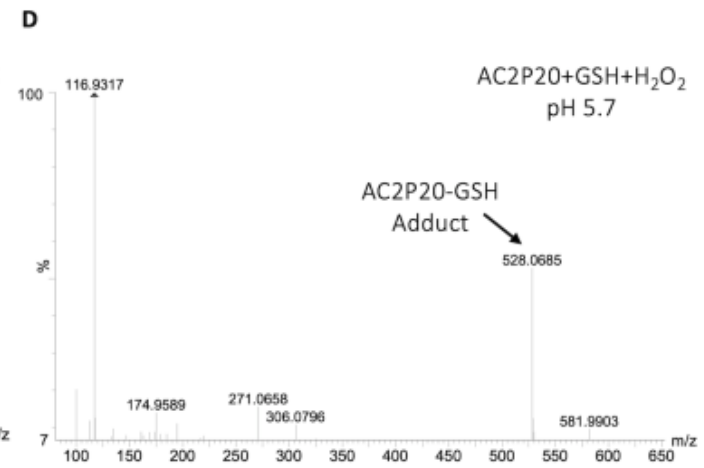

| Peak (Da)      | Possible Chemical Scaffold                                                            | Figure No.        |
|----------------|---------------------------------------------------------------------------------------|-------------------|
| 130.16         | 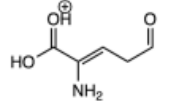    | 3C                |
| 178.12         |    | 3C                |
| 194.12         |    | 3C                |
| 206.15         |    | 3C                |
| 222.11         |    | 3C                |
| 384.02         |    | S3A, S3B, S3C     |
| 391.28         | Phthalate Plasticizer                                                                 | 3C                |
| 401.26         |    | 3C                |
| 409.04, 409.05 |  | 3B, S2C, S2D,     |
| 528.06, 528.07 |  | 3A, S2A, S2B, S3D |
| 530.08         |  | 3C                |
